# Supplementary material
Source: Springer Nature journal article supplement (https://www.springermedizin.de/resource/supplementary/12889_2012_4165_MOESM2_ESM.pdf/9491526)
Supplement: MOESM2 [file 9491526]

|                     |                                                                              |                           |
|---------------------|------------------------------------------------------------------------------|---------------------------|
| Name:.....          | <b>G K Disability Survey, 2009</b>                                           | Village:.....             |
| GA: ..... PA: ..... | Male <input type="checkbox"/> Female <input type="checkbox"/> Age..... Years | Union..... Upazilla:..... |

Husband/wife alive? Yes  No  If yes, age of husband/wife \_\_\_years (if >65 mark name on the list)

| Do you experience difficulty in doing the following things?                                                        | Opinion of senior person   |                                |                                         |                            | Paramedic:<br>Degree<br>underrated? |
|--------------------------------------------------------------------------------------------------------------------|----------------------------|--------------------------------|-----------------------------------------|----------------------------|-------------------------------------|
|                                                                                                                    | I experience no<br>problem | Yes, I have<br>some difficulty | Yes, I<br>experience much<br>difficulty | I cannot do this<br>at all | √ + ++                              |
| 1. Any difficulty seeing things? (even with glasses?)                                                              |                            |                                |                                         |                            |                                     |
| 2. Any difficulty hearing? (Even with Hearing aid)?                                                                |                            |                                |                                         |                            |                                     |
| 3. Is there Any difficulty in getting up from sitting position without help?                                       |                            |                                |                                         |                            |                                     |
| 4. Is there Any difficulty in standing without holding on to something?                                            |                            |                                |                                         |                            |                                     |
| 5. Can you walk by yourself within the house?                                                                      |                            |                                |                                         |                            |                                     |
| 6. Can you go outside the house – some distance?                                                                   |                            |                                |                                         |                            |                                     |
| 7. If there is water in a bucket, can you take bath by yourself.                                                   |                            |                                |                                         |                            |                                     |
| 8. Can you go to the lavatory by yourself?                                                                         |                            |                                |                                         |                            |                                     |
| 9. Do you feel difficulties to listen to or to understand people's speech or what people around are talking about? |                            |                                |                                         |                            |                                     |
| 10. Can you remember what you did, eat or who visited you yesterday?                                               |                            |                                |                                         |                            |                                     |
| 11. Any difficulty in lifting or carrying heavy things?                                                            |                            |                                |                                         |                            |                                     |
| 12. Any difficulty in getting enough food?                                                                         |                            |                                |                                         |                            |                                     |

13. Do you have any health problem that makes life difficult? Yes  No

- If the answer is yes, which ones are most troublesome?

- |                                                   |                                                  |                                              |
|---------------------------------------------------|--------------------------------------------------|----------------------------------------------|
| Pain in different joints <input type="checkbox"/> | Chest pain <input type="checkbox"/>              | Sexual difficulties <input type="checkbox"/> |
| Breathing problem <input type="checkbox"/>        | Very often depressed <input type="checkbox"/>    | Itching <input type="checkbox"/>             |
| Incontinence (urine) <input type="checkbox"/>     | Prolapse uterus (woman) <input type="checkbox"/> | One sided paralysis <input type="checkbox"/> |

Any other problem – please describe: .....

14. Do your hands shake even when you are resting? Yes  No  Paramedic-Have you observed this? Yes  No

15. Does someone's help make life easier? Yes  No

If yes, who provides such help (relationship) and how?.....

16. Please describe what help you would need to make everyday life more liveable?.....

**Paramedic comment**.....

Full name of Paramedic:..... Signature of paramedic:..... Date of Survey (Bangla calendar): .....

Date of Survey ( English calendar).....
